# Supplementary material for: Nanoscale Functional Additives Application in the Low Temperature Greases
Source: MDPI journal article supplement (doi:10.3390/polym13213749), 2021-10-29
Supplement: s1 [file s1]

## Supporting info

**Table S1.** Study of the NFA Impact on the Physicochemical and Antiwear and Antiscuffing Properties of Complex Lithium Greases.

| N<br>o. | Name of indicator                                                                                     | Base<br>grease | Nano-functional additive  |                                                                                       |       |                                              |       |                     |      |            |      |                                   |          |      |   |
|---------|-------------------------------------------------------------------------------------------------------|----------------|---------------------------|---------------------------------------------------------------------------------------|-------|----------------------------------------------|-------|---------------------|------|------------|------|-----------------------------------|----------|------|---|
|         |                                                                                                       |                | Montmoril-<br>lonite K 10 | Silicon diox-<br>ide<br>(KOVELOS<br>35/01T)                                           |       | Calcium<br>Carbonate<br>(CaCO <sub>3</sub> ) |       | Calcium bo-<br>rate |      | Halloysite |      | MoS <sub>2</sub> on<br>halloysite |          |      |   |
|         |                                                                                                       |                |                           | The method of additive addition (1 - before heat treatment, 2 - after heat treatment) |       |                                              |       |                     |      |            |      |                                   |          |      |   |
|         |                                                                                                       |                |                           | 1                                                                                     | 2     | 1                                            | 2     | 1                   | 2    | 1          | 2    | 1                                 | 2        | 1    | 2 |
| 1       | Yield stress at 50°C, Pa                                                                              | 680            | 540                       | 560                                                                                   | 660   | 590                                          | 660   | 380                 | 120  | 590        | 730  | 70 0                              | 760      | 710  |   |
| 2       | Colloidal stability,% of oil<br>emitted                                                               | 19.6           | 20.9                      | 18.8                                                                                  | 19.4  | 21.0                                         | 23.7  | 24.7                | 35.2 | 19.9       | 18.9 | 24.7                              | 19.7     | 24.0 |   |
| 3       | Dropping point, ° C                                                                                   | > 250          | 240                       | 234                                                                                   | > 250 | 234                                          | > 250 | 230                 | 222  | > 250      | 245  | 211                               | 2 44     | 226  |   |
| 4       | Effective viscosity at minus<br>50°C                                                                  | 1331           | 1382                      | 1263                                                                                  | 1384  | 1245                                         | 1274  | 1274                | 450  | 1211       | 1161 | 118<br>6                          | 121<br>1 | 1191 |   |
| 5       | Lubricating properties on a<br>four-ball friction machine<br>under the temperature of (20<br>± 5) °C: |                |                           |                                                                                       |       |                                              |       |                     |      |            |      |                                   |          |      |   |
|         | - welding load, kgs                                                                                   | 178            | 224                       | 200                                                                                   | 237   | 237                                          | 188   | 200                 | 224  | 237        | 200  | 211                               | 200      | 200  |   |
|         | - wear scar, mm                                                                                       | 0.40           | 0.76                      | 0.64                                                                                  | 0.36  | 0.39                                         | 0.38  | 0.35                | 0.36 | 0.35       | 0.48 | 0.48                              | 0.41     | 0.42 |   |

**Table S2.** Study of the NFA Impact on the Physicochemical and Antiwear and Antiscuffing Properties of Polyurea Greases.

| No. | Name of indicator                                                                           | Base grease | Nano-functional additive |                                                                                       |       |                                        |       |                |       |            |      |                                |      |      |   |
|-----|---------------------------------------------------------------------------------------------|-------------|--------------------------|---------------------------------------------------------------------------------------|-------|----------------------------------------|-------|----------------|-------|------------|------|--------------------------------|------|------|---|
|     |                                                                                             |             | Montmorillonite K 10     | Silicon dioxide (KOVELOS 35/01T)                                                      |       | Calcium Carbonate (CaCO <sub>3</sub> ) |       | Calcium borate |       | Halloysite |      | MoS <sub>2</sub> on halloysite |      |      |   |
|     |                                                                                             |             |                          | The method of additive addition (1 - before heat treatment, 2 - after heat treatment) |       |                                        |       |                |       |            |      |                                |      |      |   |
|     |                                                                                             |             |                          | 1                                                                                     | 2     | 1                                      | 2     | 1              | 2     | 1          | 2    | 1                              | 2    | 1    | 2 |
| 1   | Yield stress at 50°C, Pa                                                                    | 260         | 340                      | 240                                                                                   | 360   | 310                                    | 460   | 320            | 360   | 260        | 370  | 260                            | 390  | 200  |   |
| 2   | Colloidal stability,% of oil emitted                                                        | 24.2        | 17.7                     | 19.5                                                                                  | 18.3  | 21.6                                   | 16.3  | 19.8           | 18.7  | 21.2       | 20.7 | 24.0                           | 16.2 | 24.1 |   |
| 3   | Dropping point, ° C                                                                         | 221         | > 250                    | 219                                                                                   | > 250 | 230                                    | > 250 | 230            | > 250 | 227        | 238  | 225                            | 233  | 223  |   |
| 4   | Effective viscosity at minus 50°C                                                           | 928         | 1409                     | 1081                                                                                  | 1354  | 1105                                   | 1324  | 1081           | 1379  | 1185       | 1669 | 963                            | 1779 | 820  |   |
| 5   | Lubricating properties on a four-ball friction machine under the temperature of (20 ± 5)°C: |             |                          |                                                                                       |       |                                        |       |                |       |            |      |                                |      |      |   |
|     | - welding load, kgs                                                                         | 112         | 119                      | 126                                                                                   | 133   | 126                                    | 211   | 200            | 160   | 160        | 141  | 141                            | 224  | 224  |   |
|     | - wear scar, mm                                                                             | 0.69        | 0.73                     | 0.75                                                                                  | 0.56  | 0.58                                   | 0.72  | 0.72           | 0.61  | 0.72       | 0.49 | 0.57                           | 0.66 | 0.79 |   |

**Table S3.** Study of the NFA Impact on the Physicochemical and Antiwear and Antiscuffing Properties of Polymer Greases.

| No. | Name of indicator                                                                           | Base grease | Nano-functional additive                                                              |      |                                  |      |                                        |      |                |      |            |      |                                |      |
|-----|---------------------------------------------------------------------------------------------|-------------|---------------------------------------------------------------------------------------|------|----------------------------------|------|----------------------------------------|------|----------------|------|------------|------|--------------------------------|------|
|     |                                                                                             |             | Montmorillonite K 10                                                                  |      | Silicon dioxide (KOVELOS 35/01T) |      | Calcium Carbonate (CaCO <sub>3</sub> ) |      | Calcium borate |      | Halloysite |      | MoS <sub>2</sub> on halloysite |      |
|     |                                                                                             |             | The method of additive addition (1 - before heat treatment, 2 - after heat treatment) |      |                                  |      |                                        |      |                |      |            |      |                                |      |
|     |                                                                                             |             | 1                                                                                     | 2    | 1                                | 2    | 1                                      | 2    | 1              | 2    | 1          | 2    | 1                              | 2    |
| 1   | Yield stress at 50°C, Pa                                                                    | 140         | 360                                                                                   | 380  | 300                              | 130  | 50                                     | 120  | 110            | 120  | 330        | 100  | 400                            | 120  |
| 2   | Colloidal stability,% of oil emitted                                                        | 25.7        | 24.0                                                                                  | 23.8 | 20.1                             | 26.5 | 19.7                                   | 20.1 | 20.2           | 20.8 | 22.8       | 25.4 | 21.2                           | 26.1 |
| 3   | Dropping point, ° C                                                                         | 145         | 143                                                                                   | 149  | 143                              | 150  | 143                                    | 144  | 144            | 145  | 143        | 146  | 142                            | 144  |
| 4   | Effective viscosity at minus 50°C                                                           | 2482        | 3123                                                                                  | 3240 | 1 849                            | 2120 | 2544                                   | 2389 | 2 376          | 2417 | 2022       | 2135 | 2127                           | 2182 |
| 5   | Lubricating properties on a four-ball friction machine under the temperature of (20 ± 5)°C: |             |                                                                                       |      |                                  |      |                                        |      |                |      |            |      |                                |      |
|     | - welding load, kgs                                                                         | 160         | 160                                                                                   | 160  | 160                              | 16 0 | 168                                    | 211  | 168            | 160  | 160        | 178  | 178                            | 188  |
|     | - the wear scar, mm                                                                         | 0.87        | 0.88                                                                                  | 0.90 | 0.89                             | 0.88 | 0.87                                   | 0.88 | 0.84           | 0.88 | 0.88       | 0.92 | 0.70                           | 0.54 |

**Table S4.** Study of the NFA Impact on the Physicochemical and Antiwear and Antiscuffing Properties of Complex Lithium Greases.

| No. | Name of indicator                                                                           | Base grease | Nano-functional additive                   |       |       |                                         |       |       |                |       |       |
|-----|---------------------------------------------------------------------------------------------|-------------|--------------------------------------------|-------|-------|-----------------------------------------|-------|-------|----------------|-------|-------|
|     |                                                                                             |             | Amorphous silicon dioxide (KOVELOS 35/01T) |       |       | Calcium Carbonate ( CaCO <sub>3</sub> ) |       |       | Calcium borate |       |       |
|     |                                                                                             |             | The NFA concentration, %                   |       |       |                                         |       |       |                |       |       |
|     |                                                                                             |             | 1%                                         | 2%    | 3%    | 1%                                      | 2%    | 3%    | 1%             | 2%    | 3%    |
| 1   | Yield stress at 50°C, Pa                                                                    | 680         | 660                                        | 690   | 900   | 660                                     | 700   | 740   | 590            | 400   | 140   |
| 2   | Colloidal stability,% of oil emitted                                                        | 19.6        | 19.4                                       | 18.1  | 17.3  | 23.7                                    | 20.7  | 15.3  | 19.9           | 26.0  | 30,0  |
| 3   | Dropping point, ° C                                                                         | > 250       | > 250                                      | > 250 | > 250 | > 250                                   | > 250 | > 250 | > 250          | > 250 | > 250 |
| 4   | Effective viscosity at minus 50°C                                                           | 1331        | 1384                                       | 1565  | 1630  | 1274                                    | 1476  | 2192  | 1211           | 1184  | 1035  |
| 5   | Lubricating properties on a four-ball friction machine under the temperature of (20 ± 5)°C: |             |                                            |       |       |                                         |       |       |                |       |       |
|     | - welding load, kgs                                                                         | 178         | 237                                        | 237   | 237   | 188                                     | 200   | 200   | 237            | 237   | 237   |
|     | - the wear scar, mm                                                                         | 0.40        | 0.36                                       | 0.41  | 0.44  | 0.38                                    | 0.32  | 0.33  | 0.35           | 0.34  | 0.35  |

**Table S5.** Study of the NFA Impact on the Physicochemical and Antiwear and Antiscuffing Properties of Polyurea Greases.

| No. | Name of indicator                                                                           | Base grease | Nano-functional additive                   |       |       |                                         |       |       |                |       |       |
|-----|---------------------------------------------------------------------------------------------|-------------|--------------------------------------------|-------|-------|-----------------------------------------|-------|-------|----------------|-------|-------|
|     |                                                                                             |             | Amorphous silicon dioxide (KOVELOS 35/01T) |       |       | Calcium Carbonate ( CaCO <sub>3</sub> ) |       |       | Calcium borate |       |       |
|     |                                                                                             |             | The NFA concentration, %                   |       |       |                                         |       |       |                |       |       |
|     |                                                                                             |             | 1%                                         | 2%    | 3%    | 1%                                      | 2%    | 3%    | 1%             | 2%    | 3%    |
| 1   | Yield stress at 50°C, Pa                                                                    | 260         | 360                                        | 250   | 190   | 460                                     | 400   | 360   | 360            | 390   | 370   |
| 2   | Colloidal stability,% of oil emitted                                                        | 24.2        | 18.3                                       | 18.1  | 19.2  | 16.3                                    | 18.1  | 19.3  | 18.7           | 19.4  | 18.6  |
| 3   | Dropping point, ° C                                                                         | 221         | > 250                                      | > 250 | > 250 | > 250                                   | > 250 | > 250 | > 250          | > 250 | > 250 |
| 4   | Effective viscosity at minus 50°C                                                           | 928         | 1354                                       | 1453  | 1582  | 1324                                    | 1416  | 1635  | 1379           | 1349  | 1415  |
| 5   | Lubricating properties on a four-ball friction machine under the temperature of (20 ± 5)°C: |             |                                            |       |       |                                         |       |       |                |       |       |
|     | - welding load, kgs                                                                         | 112         | 133                                        | 126   | 119   | 211                                     | 299   | 355   | 160            | 160   | 168   |
|     | - the wear scar, mm                                                                         | 0.69        | 0.56                                       | 0.75  | 0.79  | 0.72                                    | 0.66  | 0.64  | 0.61           | 0.48  | 0.45  |
